# Supplementary material
Source: MDPI journal article supplement (https://www.mdpi.com/2073-445X/11/12/2132)
Supplement: s1 [file s1]

Archive with 15 entries (15 files):
- Figure S1 Bibliometric analysis Source and Software.jpg
- Figure S2 Papers according to number of authors.jpg
- Figure S3 Overlay visualization Initial Period.png
- Figure S4 Density items visualization Initial Period.png
- Figure S5 Overlay visualization Development Period.png
- Figure S6 Density items visualization Development Period.png
- Figure S7 Overlay visualization Expansion Period.png
- Figure S8 Density items visualization Expansion Period.png
- Table S1 List of documents included in the analysis.pdf
- Table S2 VOSviewer thesaurus file Initial Period.pdf
- Table S3 The most frequent keywords.pdf
- Table S4 Example of VOSviewer thesaurus file Development Period.pdf
- Table S5 The most frequent keywords.pdf
- Table S6 Example of VOSviewer thesaurus file Expansion Period.pdf
- Table S7 The most frequent keywords.pdf
