# Supplementary material
Source: MDPI journal article supplement (https://www.mdpi.com/2073-445X/11/12/2132)

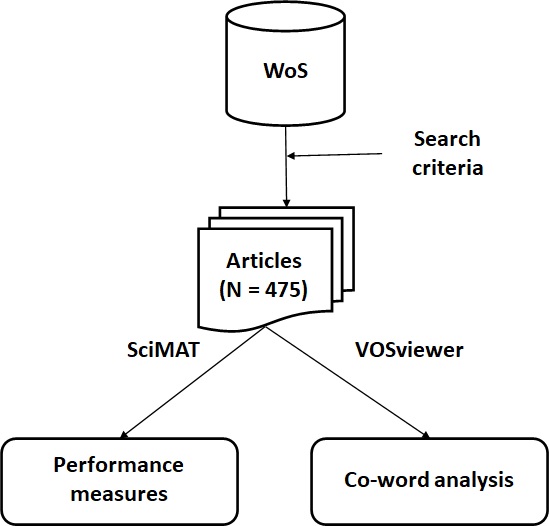

Supplement: s1 [file s1 › Figure S1 Bibliometric analysis Source and Software.jpg]

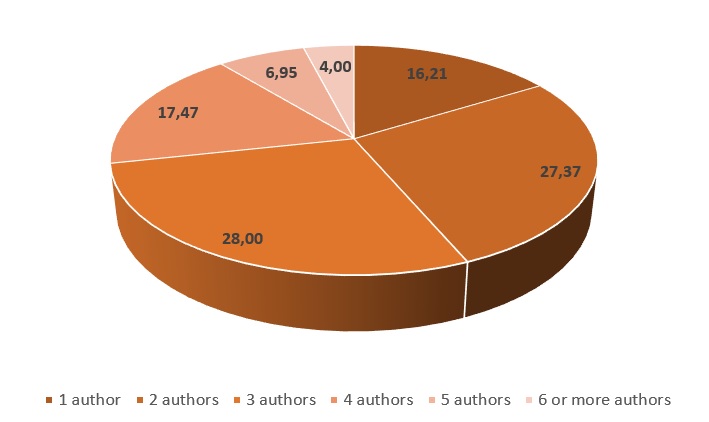

Supplement: s1 [file s1 › Figure S2 Papers according to number of authors.jpg]

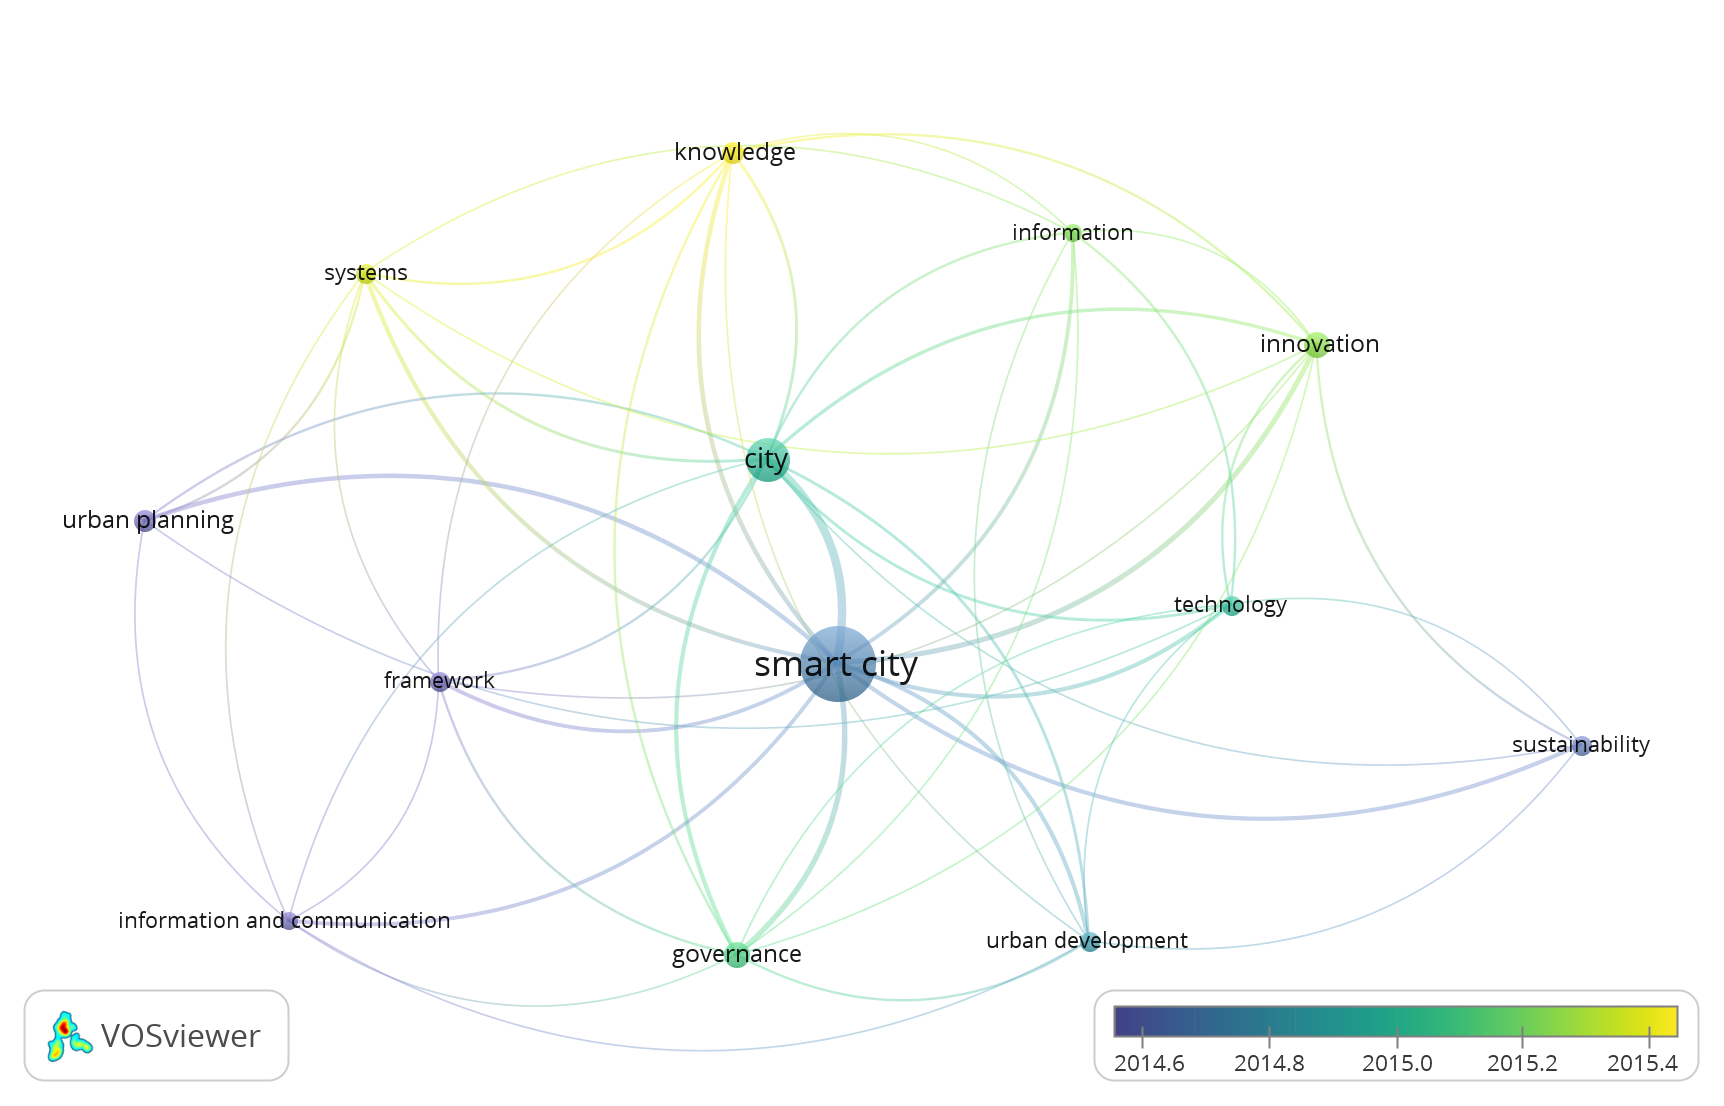

Supplement: s1 [file s1 › Figure S3 Overlay visualization Initial Period.png]

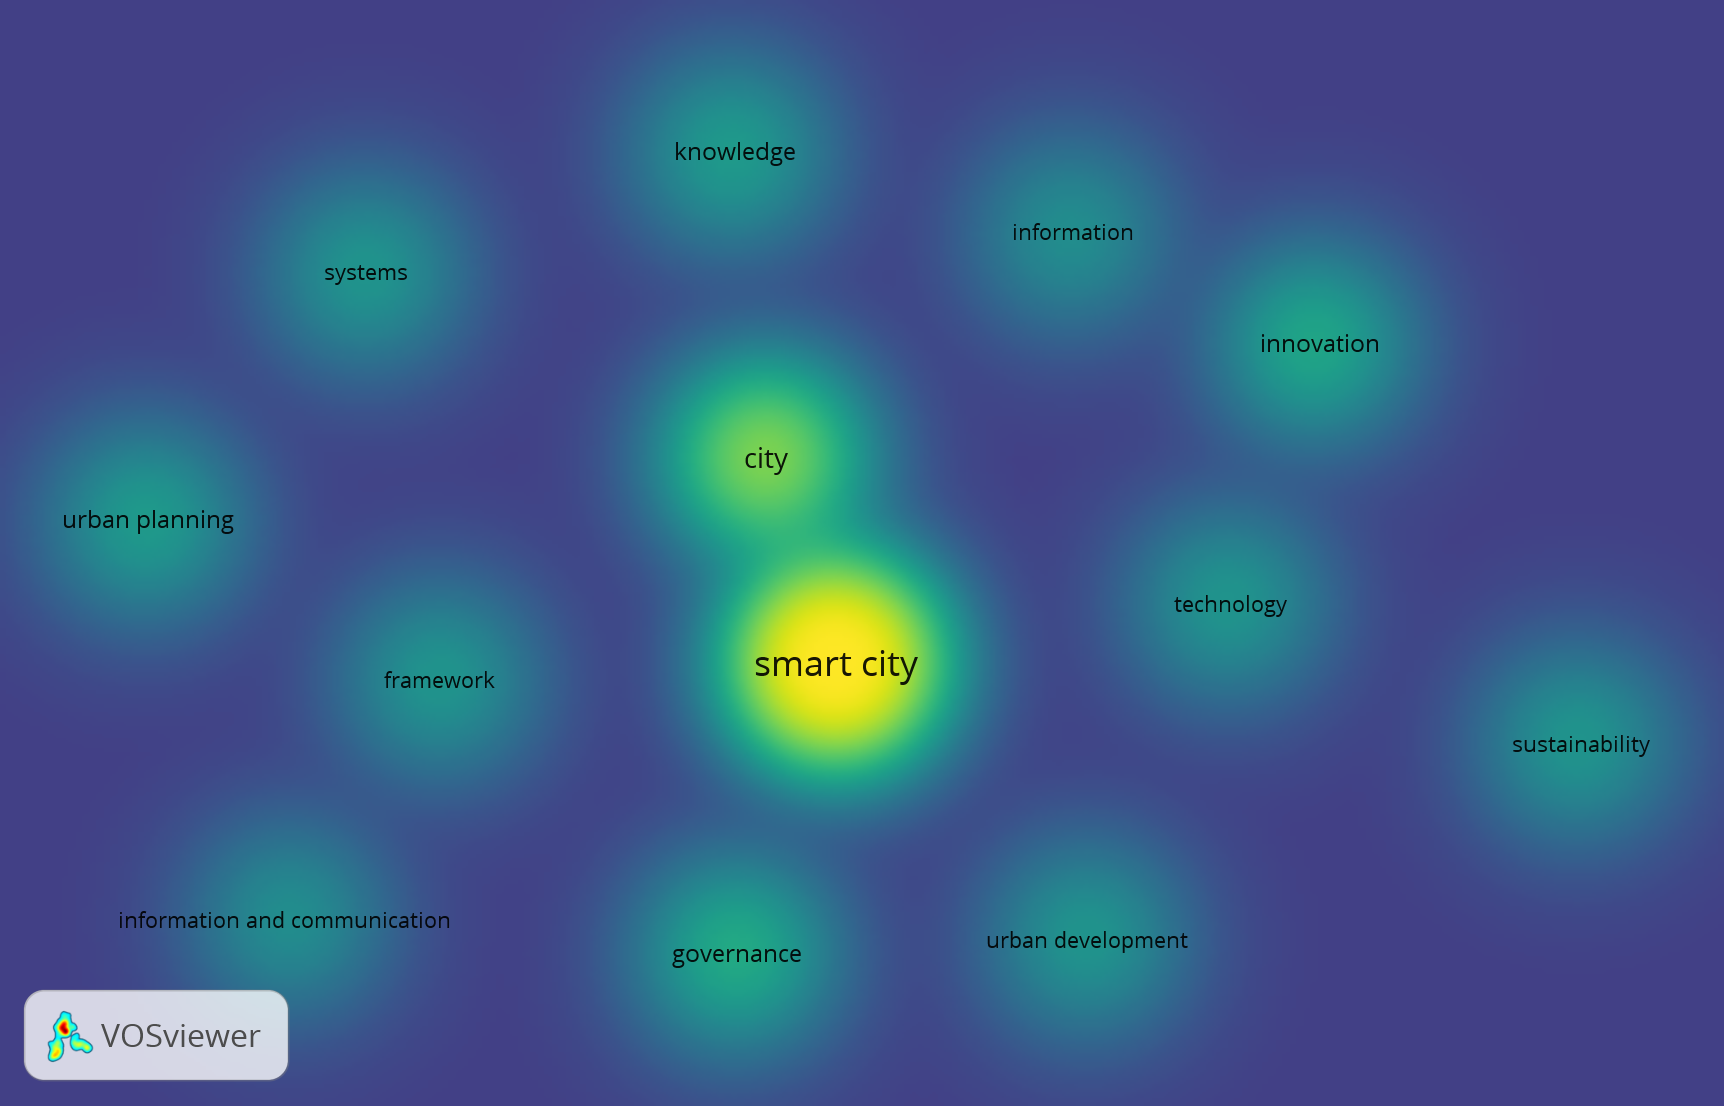

Supplement: s1 [file s1 › Figure S4 Density items visualization Initial Period.png]

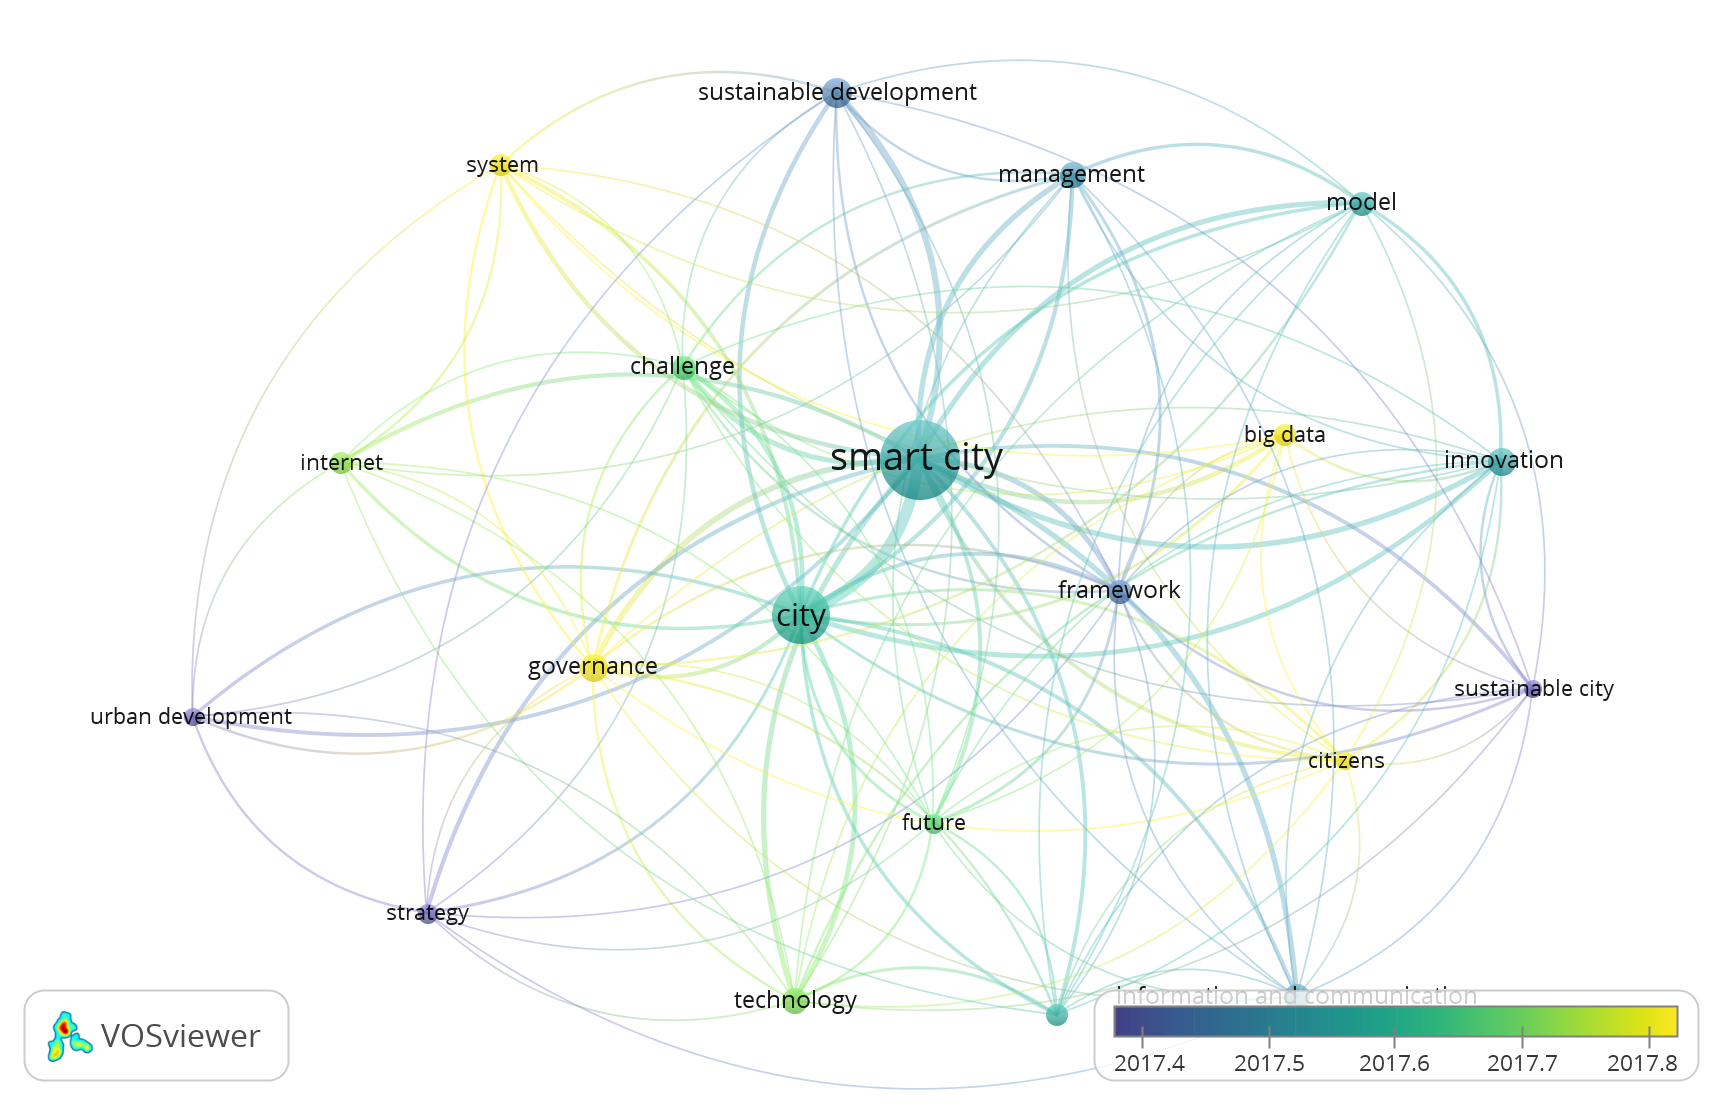

Supplement: s1 [file s1 › Figure S5 Overlay visualization Development Period.png]

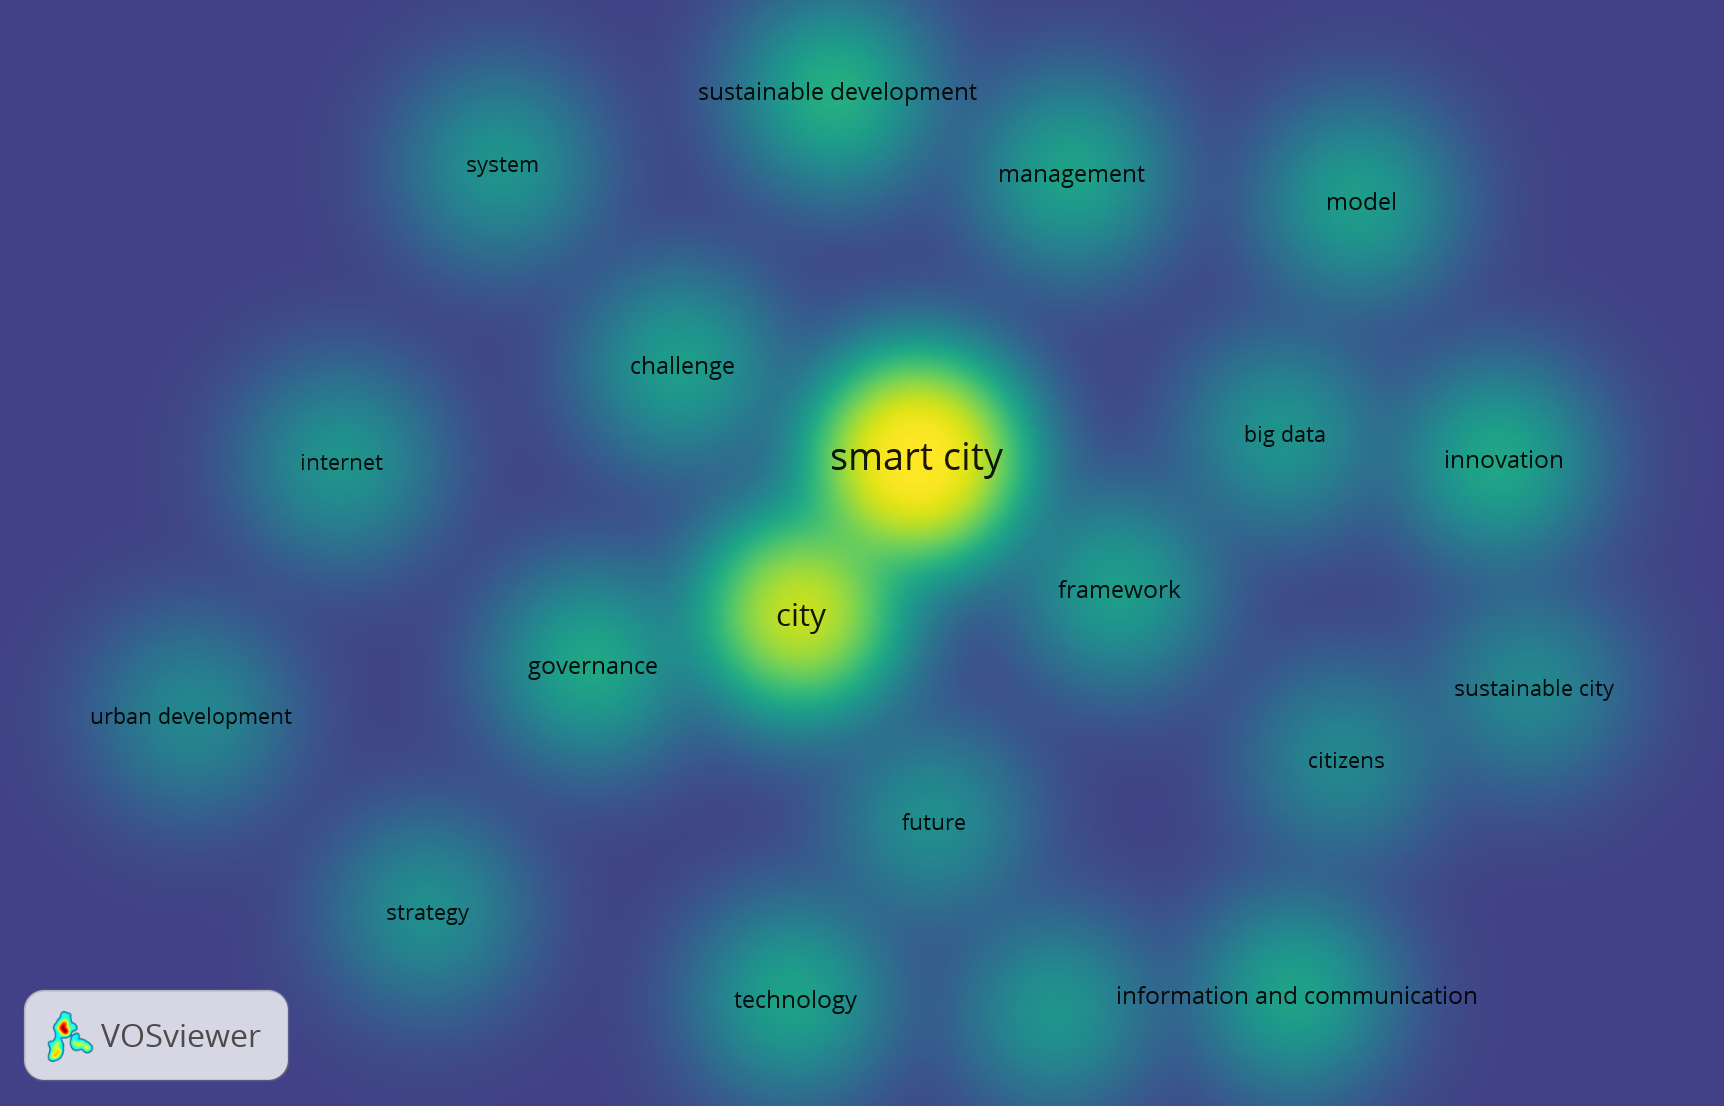

Supplement: s1 [file s1 › Figure S6 Density items visualization Development Period.png]

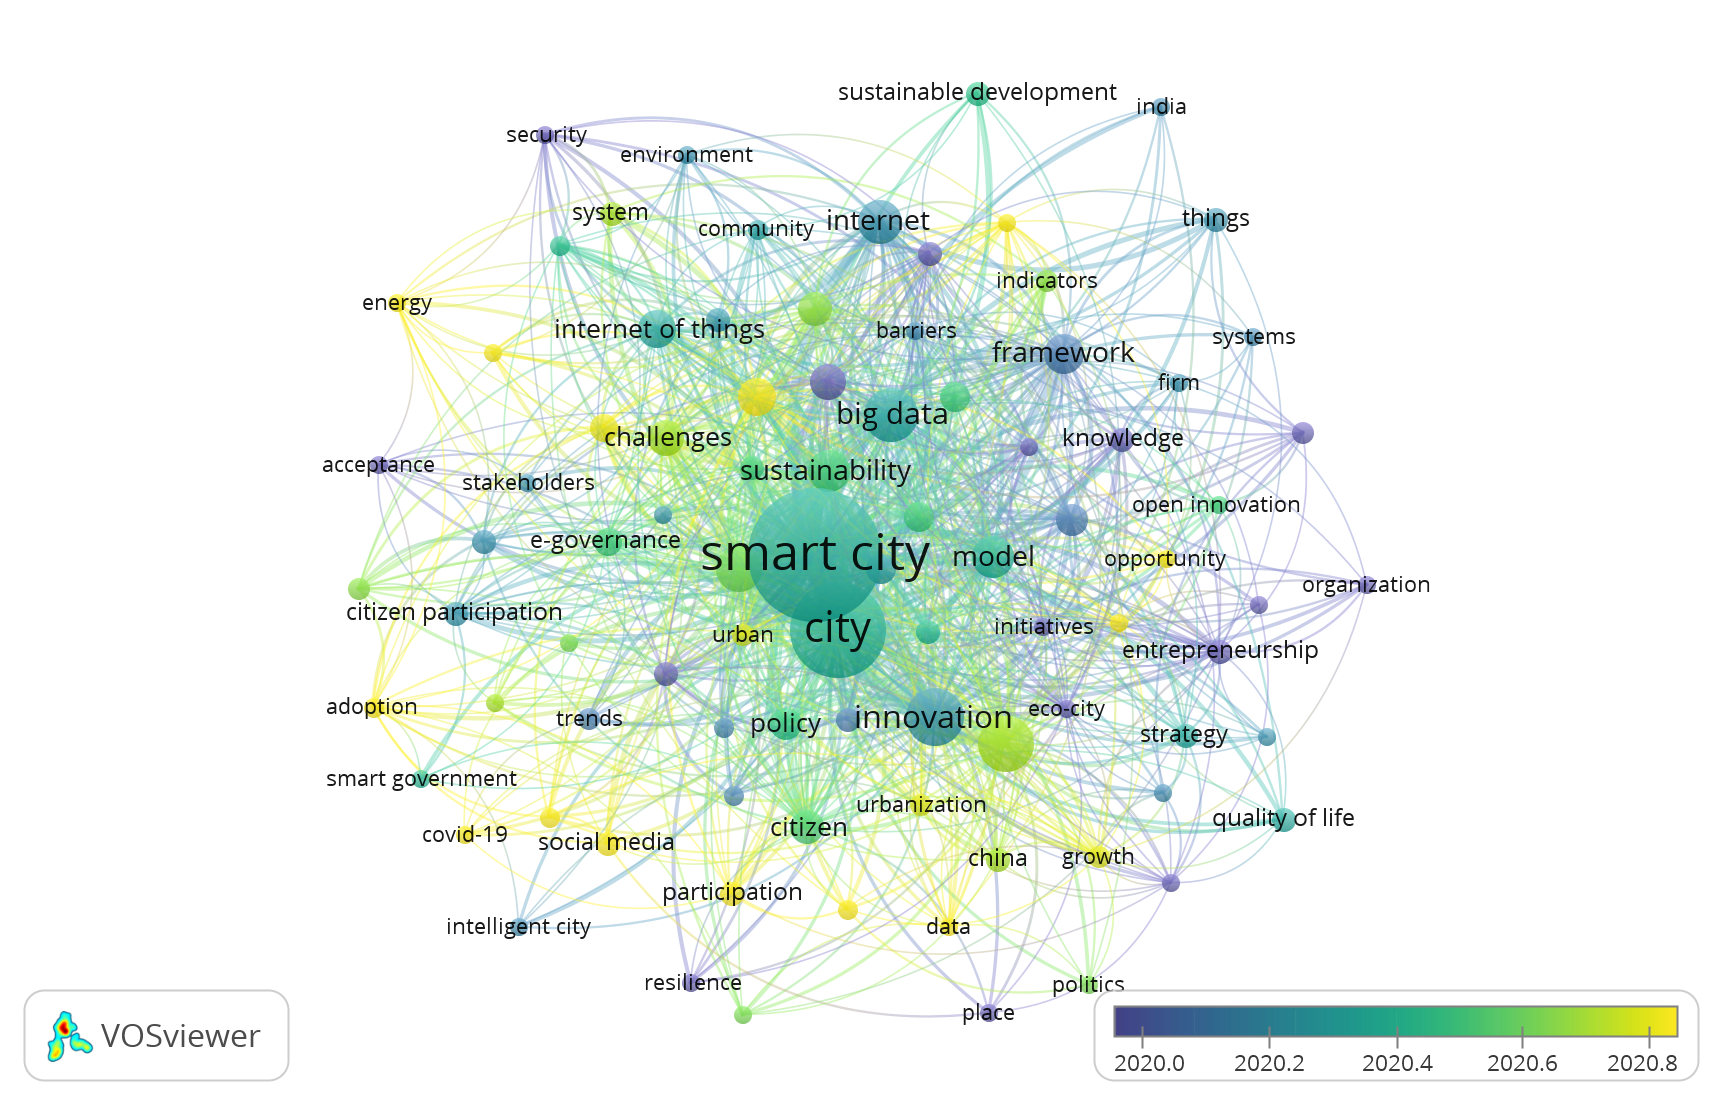

Supplement: s1 [file s1 › Figure S7 Overlay visualization Expansion Period.png]

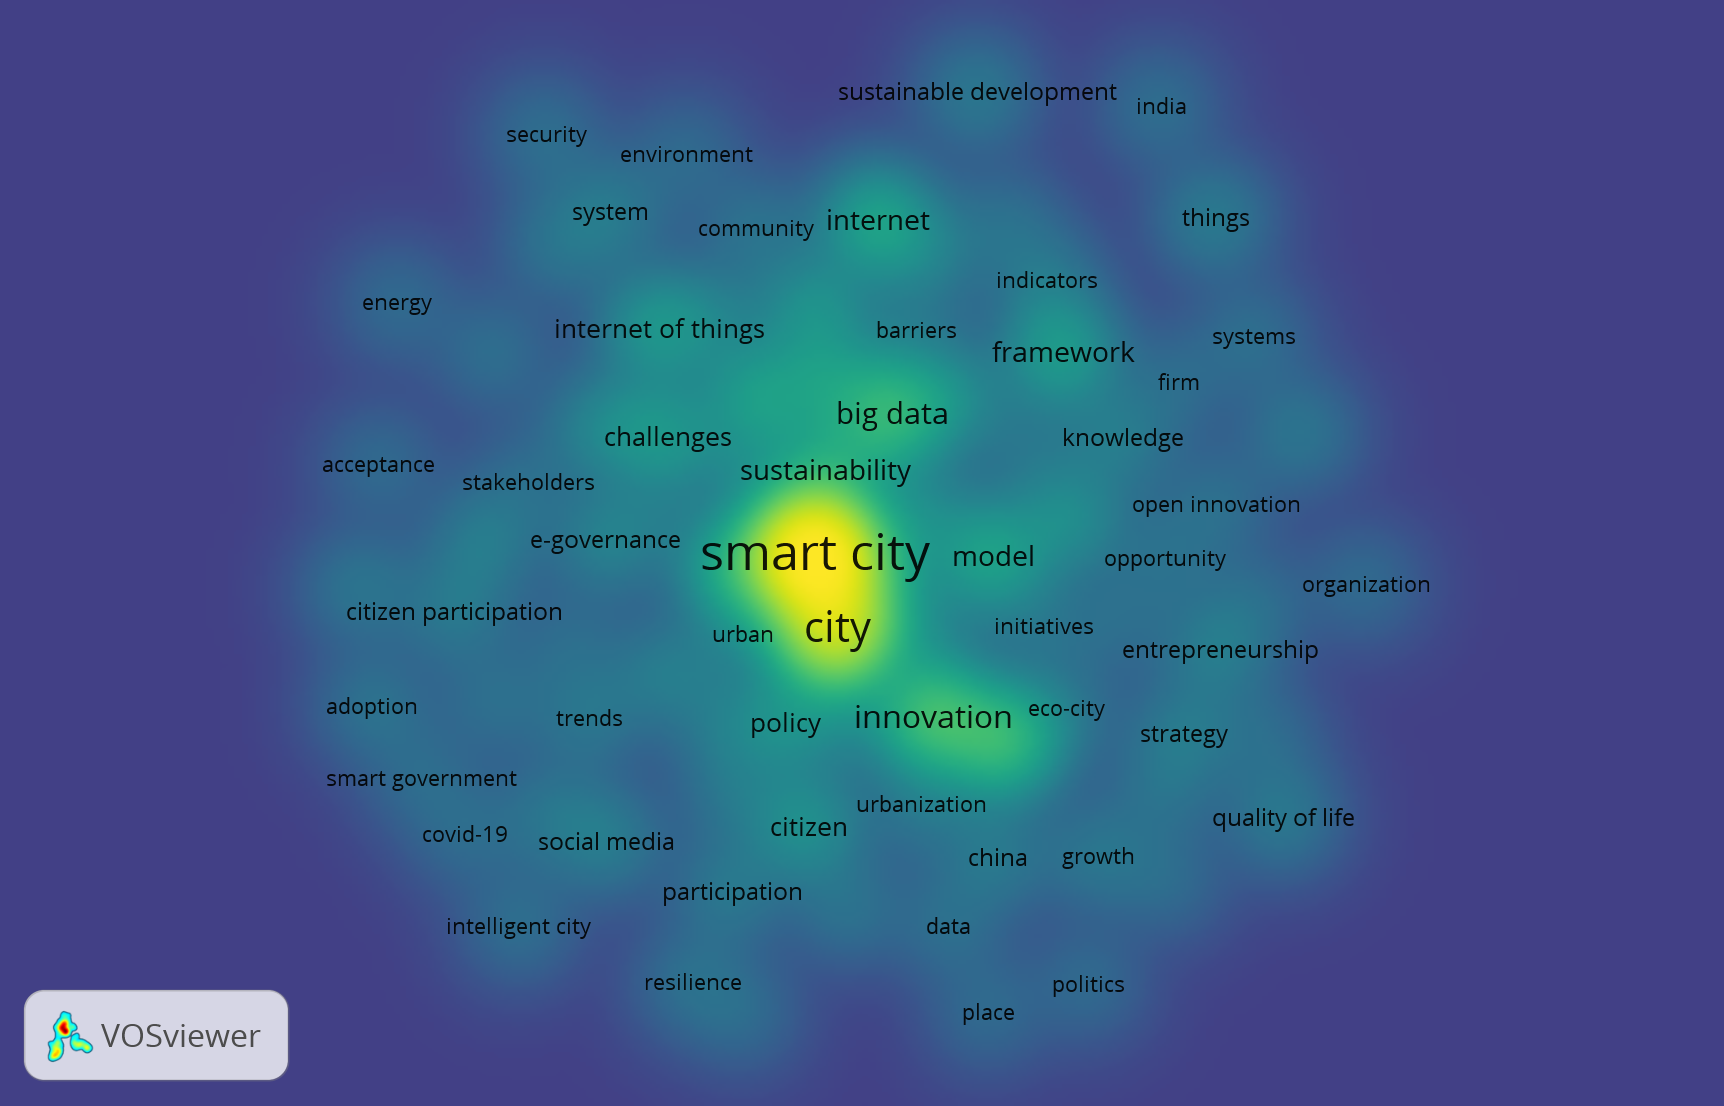

Supplement: s1 [file s1 › Figure S8 Density items visualization Expansion Period.png]
